# Supplementary material for: Mechanistic Insights into Nonylphenol Stress on BMP2 and BMP4 Gene Expression in Red Crucian Carp (Carassius auratus Red var.)
Source: MDPI journal article supplement (doi:10.3390/fishes9050159), 2024-04-28
Supplement: s1 [file s1]

**Table S1.** Embryo sampling details for NP exposure experiments.

| Groups                 | Parallel replicates<br>(Petri dishes) | Embryos per<br>Petri dish | Tubes collected at<br>each time point | Embryos per<br>tube |
|------------------------|---------------------------------------|---------------------------|---------------------------------------|---------------------|
| 0 $\mu\text{mol/L}$ NP | 5                                     | 300                       | 3                                     | 30                  |
| 3 $\mu\text{mol/L}$ NP | 5                                     | 300                       | 3                                     | 30                  |

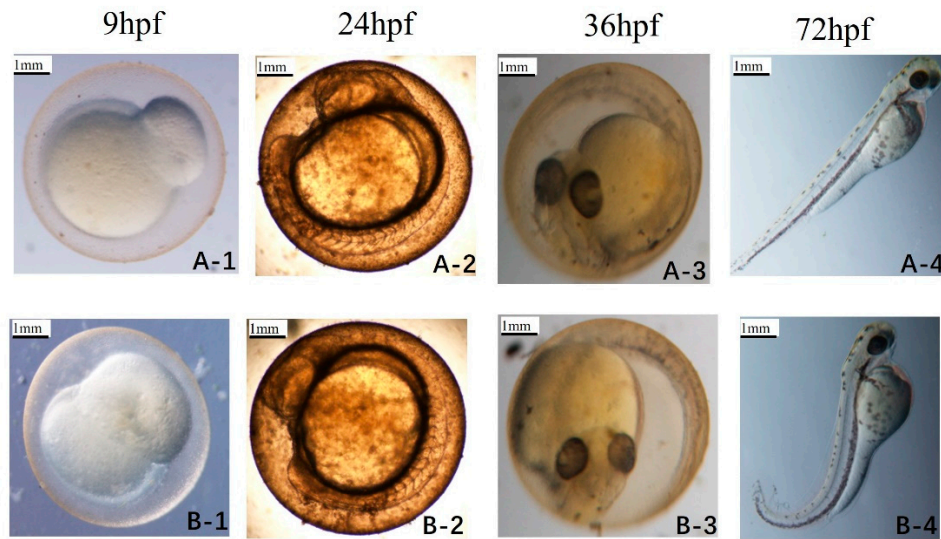

**Figure S1.** Morphological changes of the *Carassius auratus* red var. embryos at different developmental stages exposed to NP (Figures A1-4 represent the control group, B1-4 represent the treated group).
